# Supplementary material for: Anion-dependent coordinative networking of macrocycle with copper(i) halides
Source: Royal Society of Chemistry journal article supplement (doi:10.1039/c2ce25111f), 2012-01-01
Supplement: c2ce25111f.pdf [file c2ce25111f.pdf]

## **Electronic Supplementary Information**

**For**

### **Anion-dependent coordinative networking of macrocycle with copper(I) halides**

In-Hyeok Park,<sup>‡</sup> Hyun Jee Kim<sup>‡</sup> and Shim Sung Lee<sup>\*</sup>

*Department of Chemistry and Research Institute of Natural Science,  
Gyeongsang National University, Jinju 660-701, S. Korea*

<sup>‡</sup>These authors contributed equally.

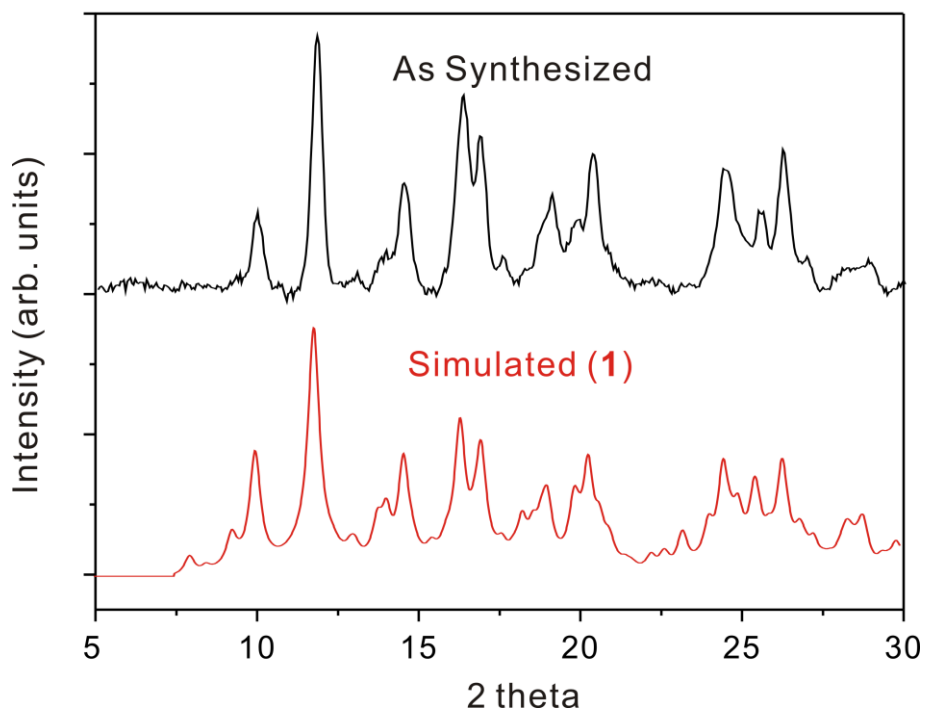

**Fig. S1** Comparison of XRPD patterns: (top) as synthesized and (bottom) **1** simulated from the single crystal X-ray data.

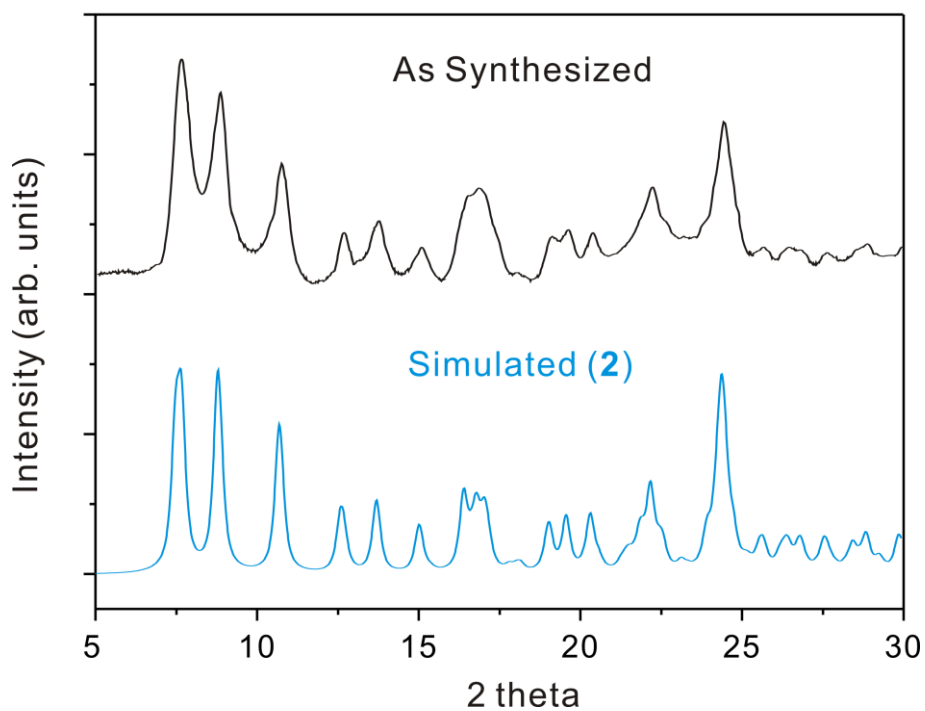

**Fig. S2** Comparison of XRPD patterns: (top) as synthesized and (bottom) **2** simulated from the single crystal X-ray data.

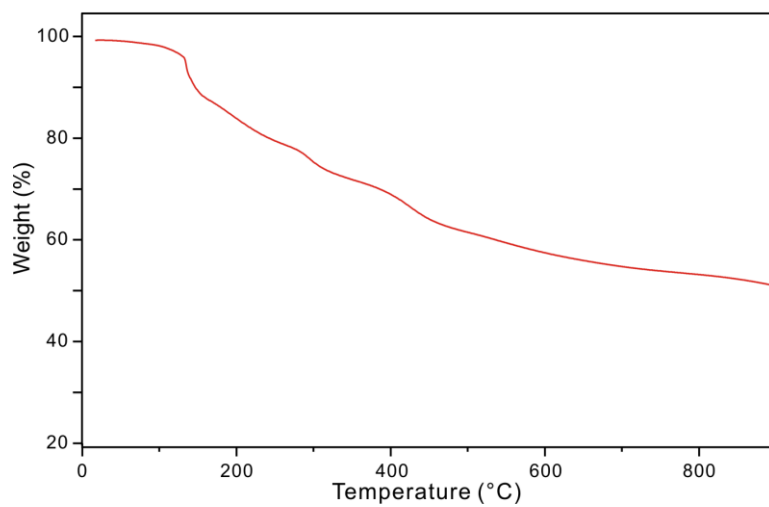

**Fig. S3** TGA curve of **1**.

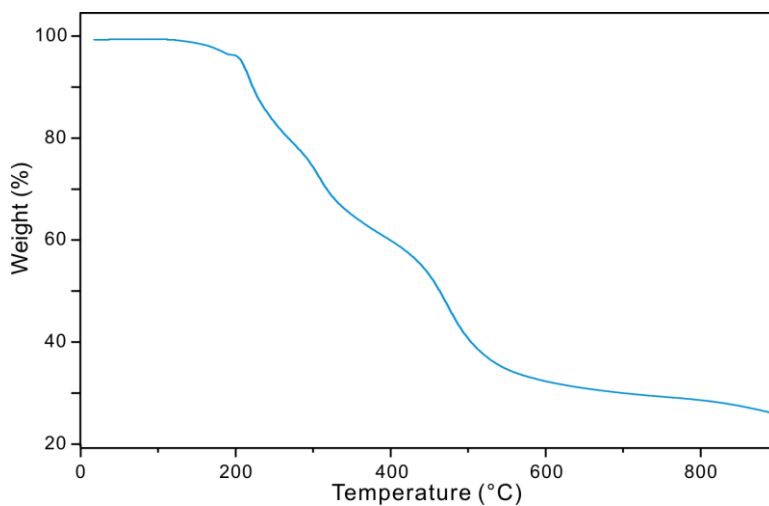

**Fig. S4** TGA curve of **2**.

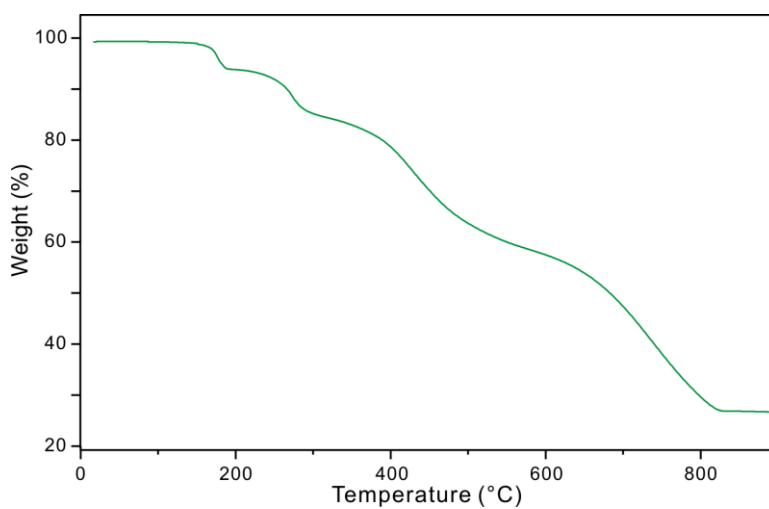

**Fig. S5** TGA curve of **3**.

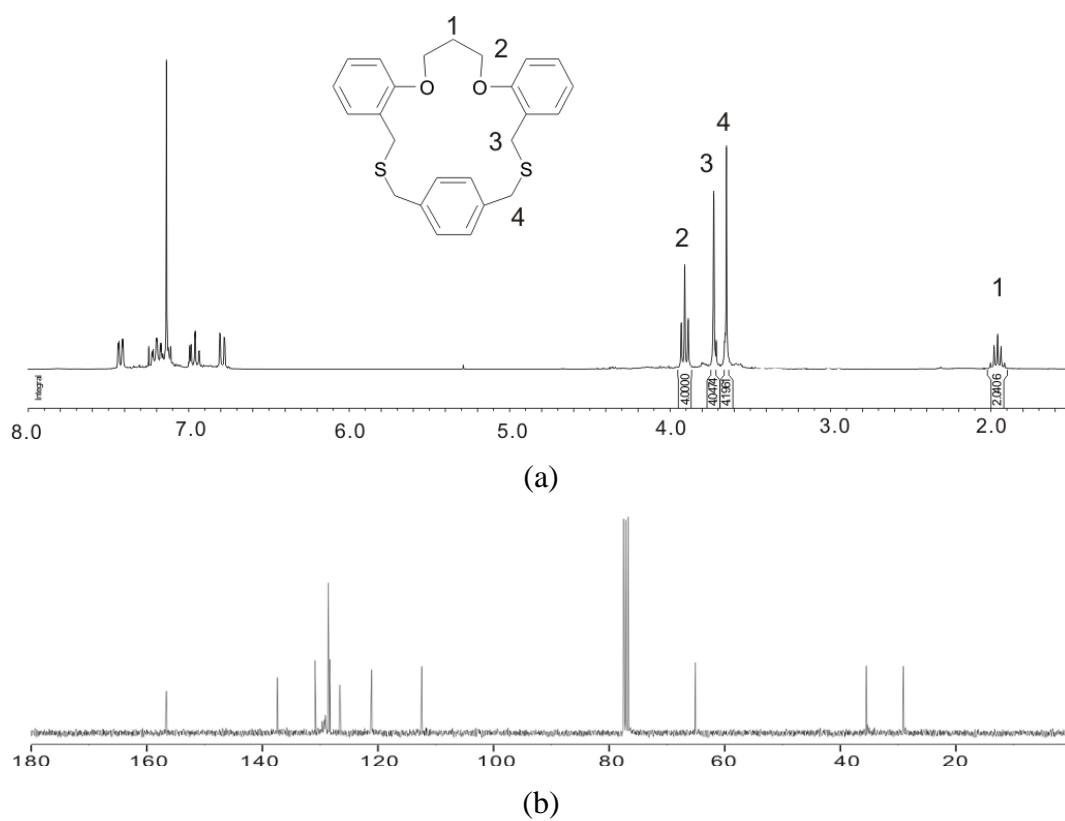

**Fig. S6** (a) <sup>1</sup>H and (b) <sup>13</sup>C NMR spectra of **L** in CDCl<sub>3</sub>.

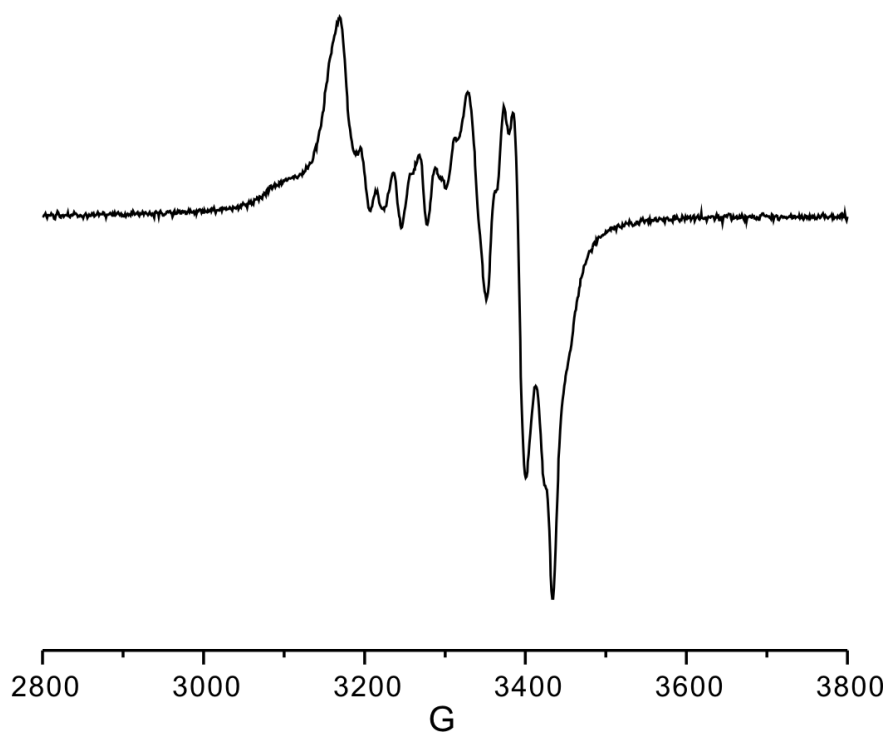

**Fig. S7** EPR spectrum of **1** at room temperature.

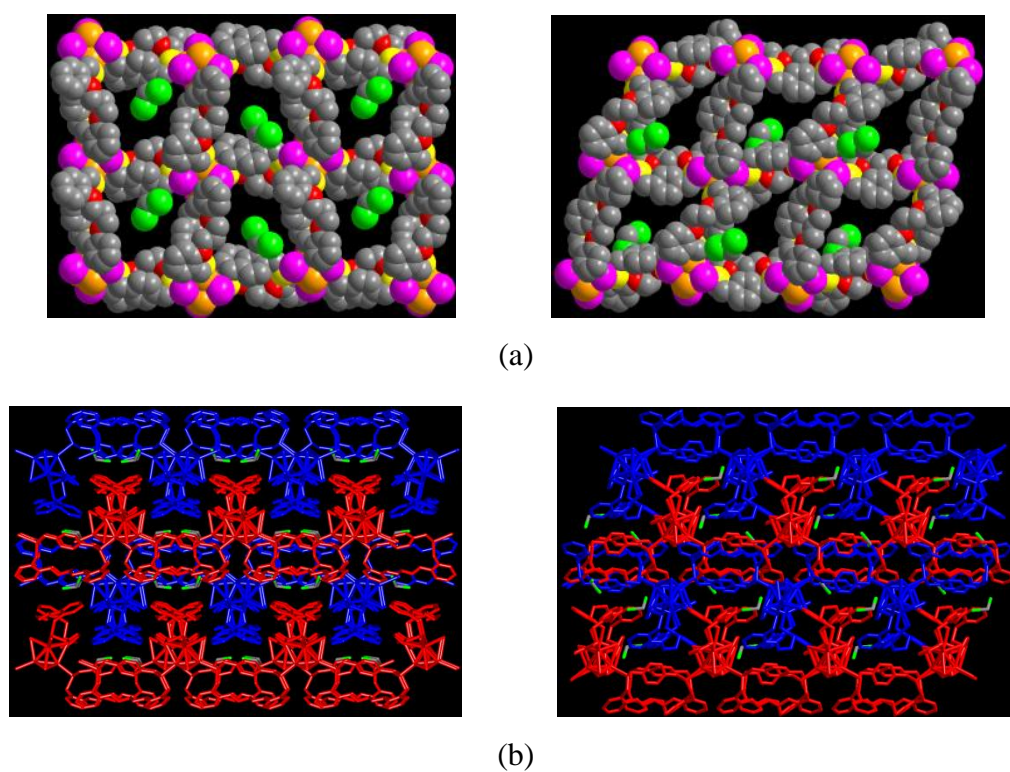

**Fig. S8** Comparison of the 2D network structures of (*left*) **3a**,  $\{[\text{Cu}_4\text{I}_4(\text{L})_2]\cdot\text{CH}_2\text{Cl}_2\}_n$  and (*right*) **3b**,  $\{[\text{Cu}_4\text{I}_4(\text{L})_2]\cdot\text{CH}_2\text{Cl}_2\}_n$ : (a) square grid structures (ball) and (b) layer-to-layer packing arrangements (stick).

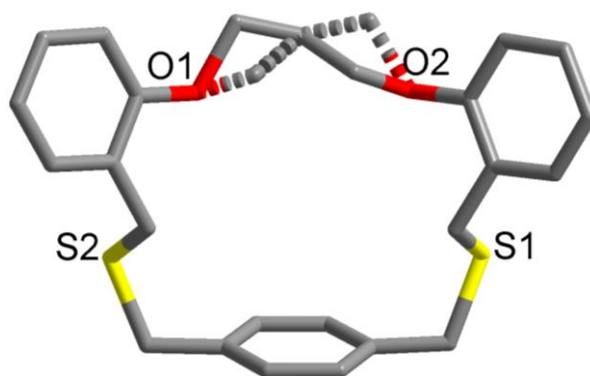

**Fig. S9** Crystal structure of **L**, showing the disorder between two oxygen atoms (55:45).
